# Supplementary material for: Anti-Biofilm and Associated Anti-Virulence Activities of Selected Phytochemical Compounds against Klebsiella pneumoniae
Source: MDPI journal article supplement (doi:10.3390/plants11111429), 2022-05-27
Supplement: s1 [file s1]

## Supplementary data

**Table S1.** Exopolysaccharide reduction in *K. pneumoniae* (ATCC 700603 and ATCC BAA-1705) by studied phytochemical compounds

| Compounds       | <i>K. pneumoniae</i> ATCC 700603 |                   | <i>K. pneumoniae</i> ATCC BAA-1705 |                   |
|-----------------|----------------------------------|-------------------|------------------------------------|-------------------|
|                 | EPS Quantity<br>(OD Values)      | % of EPS Quantity | EPS Quantity<br>(OD Values)        | % of EPS Quantity |
| Phytol          | 1.19                             | 34.09             | 2.41                               | 61.01             |
| Glycitein       | 2.69                             | 77.08             | 2.39                               | 60.51             |
| Camphene        | 1.19                             | 34.09             | 2.22                               | 56.20             |
| Fisetin         | 1.65                             | 47.28             | 2.83                               | 71.65             |
| Alpha-terpinene | 2.24                             | 64.18             | 2.63                               | 66.58             |
| <b>Controls</b> |                                  |                   |                                    |                   |
| Quercetin       | 2.68                             | 76.79             | 3.42                               | 86.58             |
| Ciprofloxacin   | 1.05                             | 31.55             | 2.01                               | 53.74             |
| 1% DMSO         | 4.17                             | 119.48            | 4.13                               | 104.56            |
